# Supplementary material for: Collembase: a repository for springtail genomics and soil quality assessment
Source: PubMed Central journal article supplement (PMC2234260; doi:10.1186/1471-2164-8-341), 2007-09-27

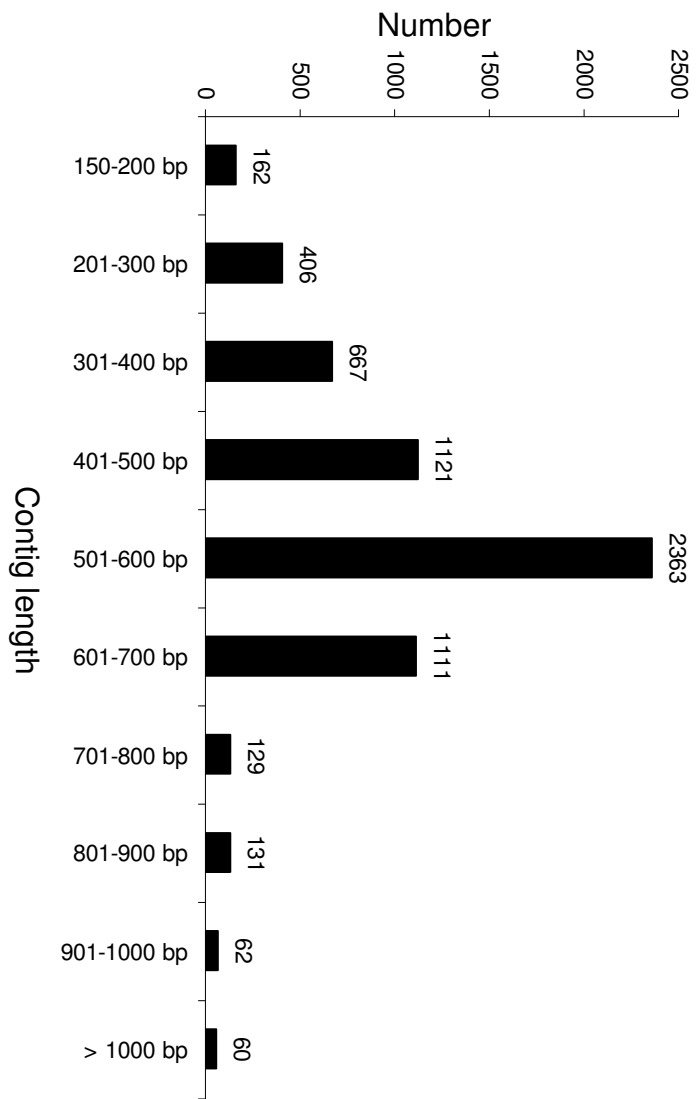

Supplement: 1471-2164-8-341-S2.pdf [file 1471-2164-8-341-S2.pdf]
